# Supplementary material
Source: PubMed Central journal article supplement (PMC3228040)

**Supplemental online Figure S1.**

Representative F4/80 antigen immunohistochemistry stainings (X40) of xenografted tumors. There were no differences observed in macrophage tumor infiltration as a function of treatment irrespective of the tumor size.

In vitro  
pre-treatment

In vivo treatment

Saline

Cetuximab

0 Gy

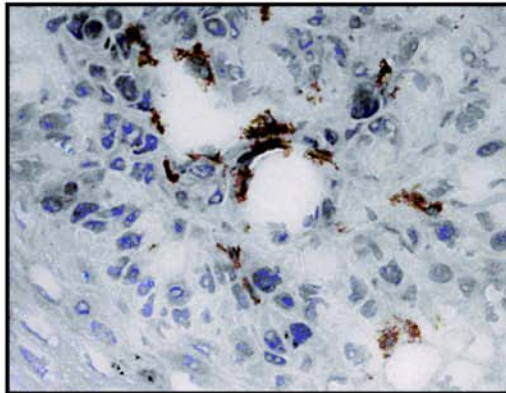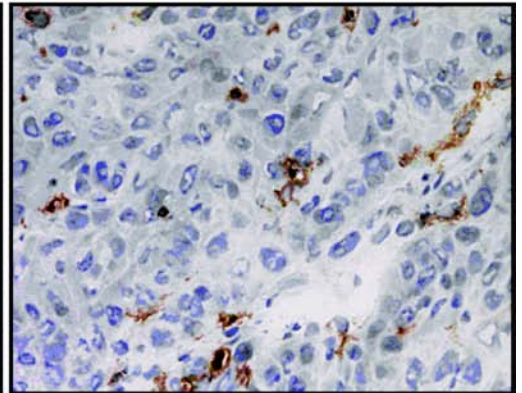

2 Gy x 4

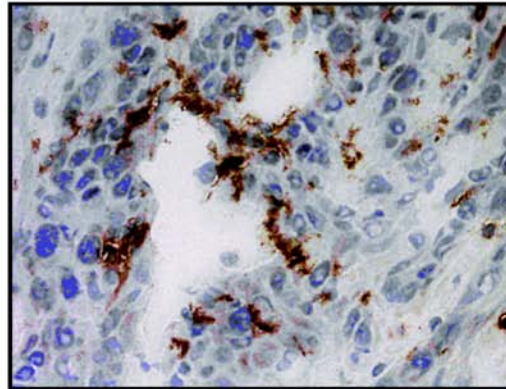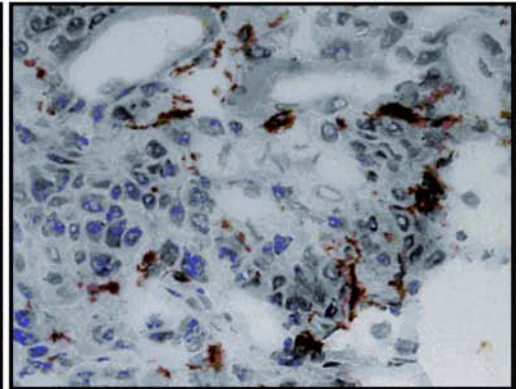

Supplement: supp_the2008-0290_Supplemental_online_Figure_S1.pdf [file supp_the2008-0290_Supplemental_online_Figure_S1.pdf]
