# Supplementary material
Source: PubMed Central journal article supplement (PMC3228040)

**Supplemental online Figure S2.**

Cetuximab inhibited the growth of tumors derived from *in vitro*-irradiated A431 cells. Tumors of mice treated with the antibody (bold bars) required more time to reach the same volume than tumors of saline-treated mice (light bars). Six independent experiments with 3 mice per experiment were performed. \* $p < 0.05$  compared with saline treatment (log-rank test).

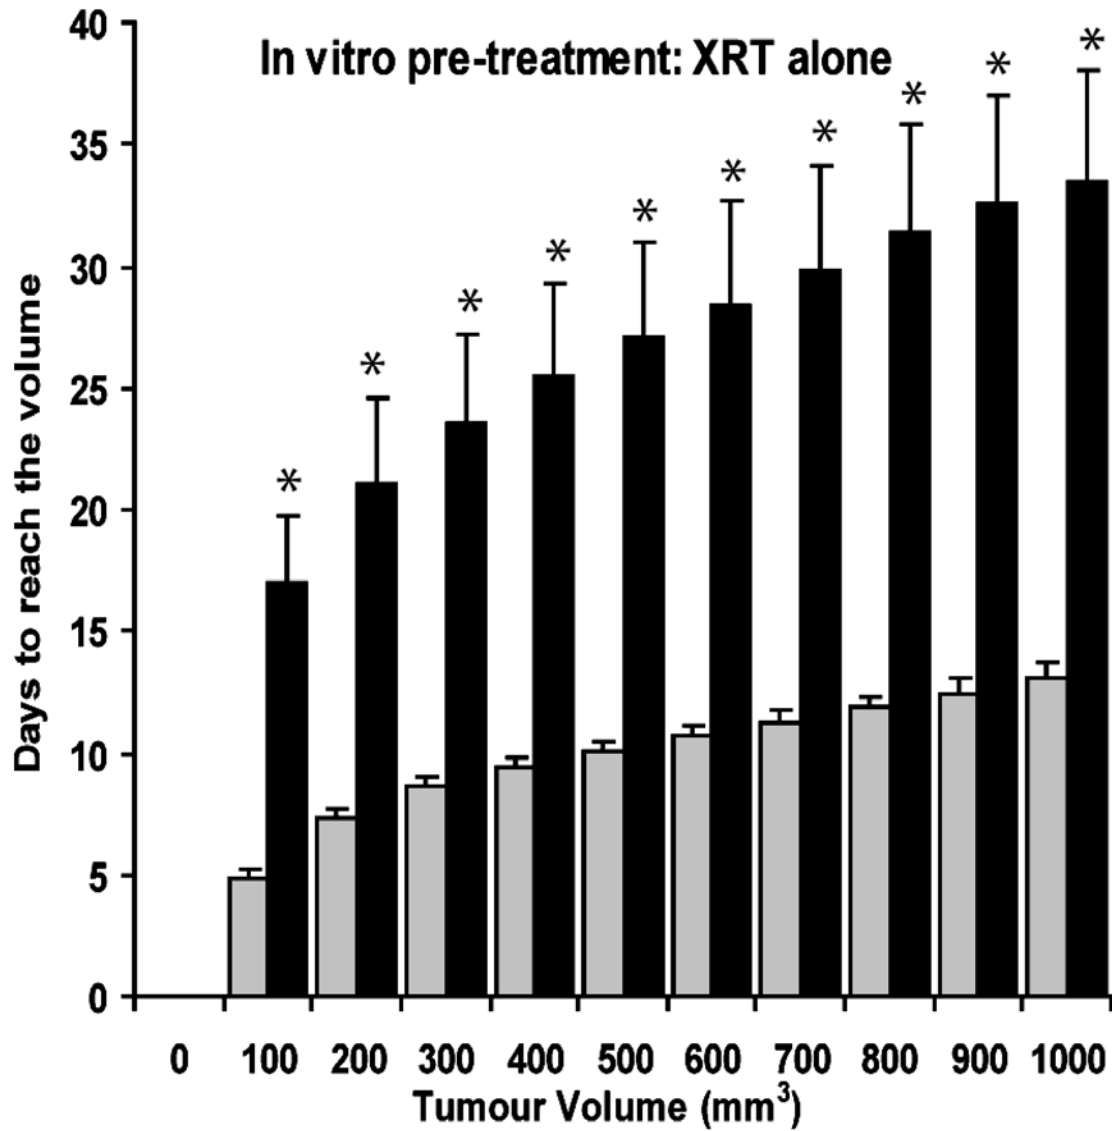

Supplement: supp_the2008-0290_Supplemental_online_Figure_S2.pdf [file supp_the2008-0290_Supplemental_online_Figure_S2.pdf]
