# Supplementary material
Source: PubMed Central journal article supplement (PMC3228040)

**Supplemental online Figure S3.**

Radiation stimulated VEGF secretion and cetuximab inhibited it. Exponential growing A431 cells were treated with a dose of 8 Gy. Cetuximab was added just before radiation. VEGF was measured at indicated time points. Values are the mean  $\pm$  SE of 2 independent experiments with two replicates per experiment.

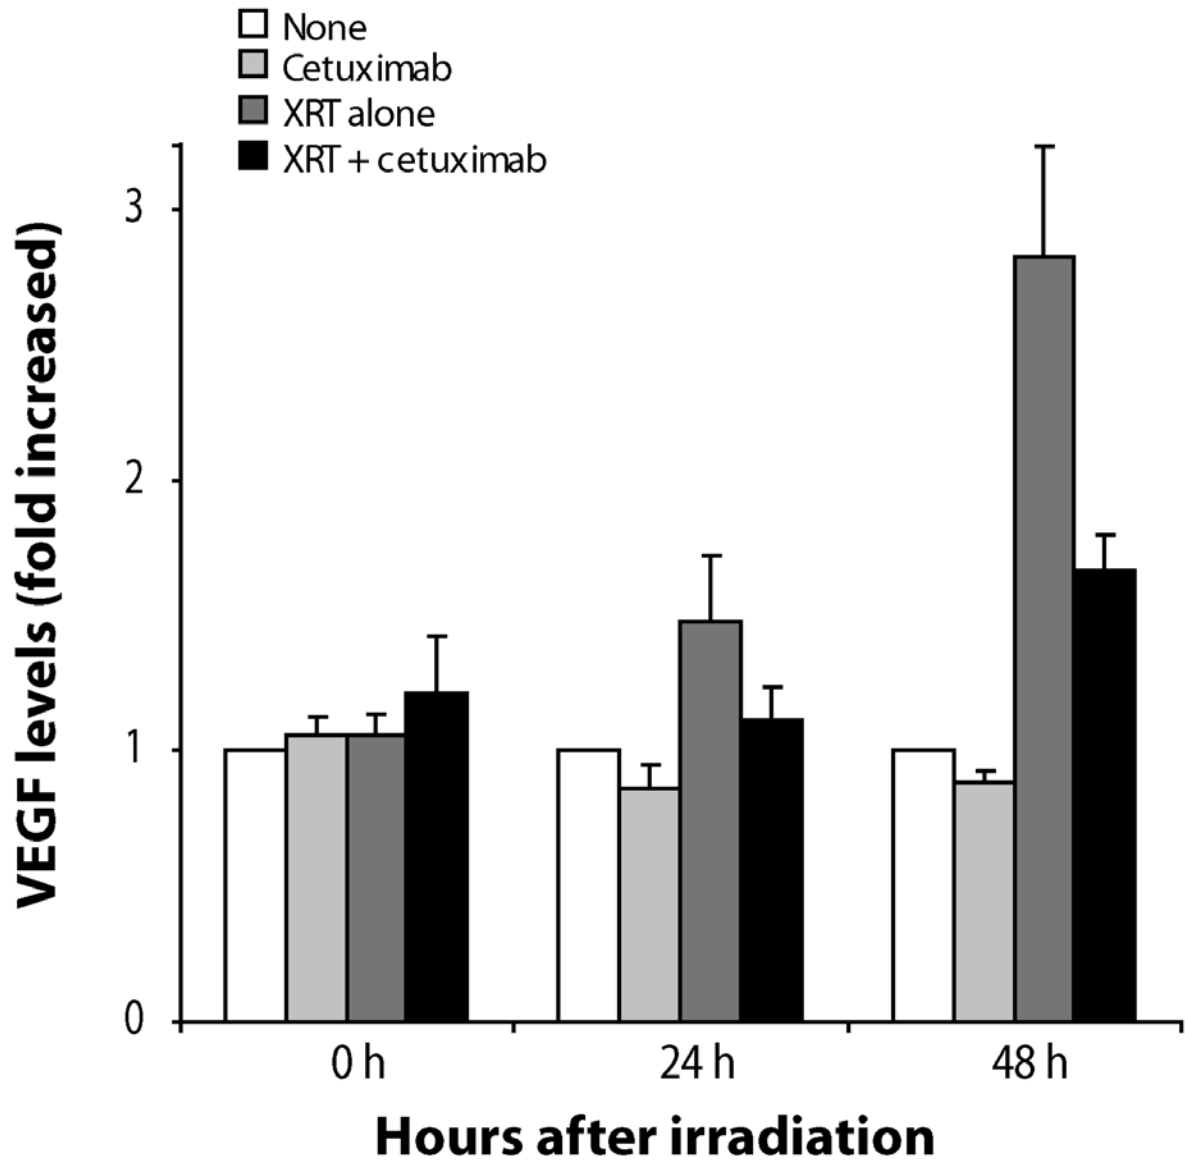

Supplement: supp_the2008-0290_Supplemental_online_Figure_S3.pdf [file supp_the2008-0290_Supplemental_online_Figure_S3.pdf]
