# Supplementary material
Source: PubMed Central journal article supplement (PMC3228040)
Supplement: supp_the2008-0290_Supplemental_online_Table_S1.pdf [file supp_the2008-0290_Supplemental_online_Table_S1.pdf]

**Supplemental online Table S1.** Tumor microvessel density as a function of treatment

| <i>In vitro</i> pre-treatment | <i>In vivo</i> treatment      |              |                 |        |
|-------------------------------|-------------------------------|--------------|-----------------|--------|
|                               | Saline                        | Cetuximab    | <i>p</i> -value | Factor |
| None (A)                      | 18.49 ± 1.47                  | 14.80 ± 0.93 | 0.038           | 1.25   |
| 30 nM cetuximab alone (B)     | 22.20 ± 1.23                  | 18.93 ± 0.98 | 0.041           | 1.17   |
| XRT alone (C)                 | 35.63 ± 1.70*                 | 23.96 ± 1.41 | 0.000           | 1.49   |
| XRT + cetuximab withdrawn (D) | 34.29 ± 1.32*                 | 24.98 ± 1.60 | 0.000           | 1.37   |
| XRT + cetuximab (E)           | 27.00 ± 1.68* <sup>†</sup> ** | 24.53 ± 1.25 | 0.245           | 1.10   |

Values are expressed as means ± SE with 9 tumors per series and 5 fields of X40 per tumor.

\**p* < 0.05 versus (A) and (B); \*\**p* < 0.05 versus (C) and (D). Differences between (A) and (B) were *p* = 0.055 (Student's *t*-test)
